# Supplementary material
Source: PubMed Central journal article supplement (PMC3758923)
Supplement: NIHMS471429-supplement-2.pdf [file NIHMS471429-supplement-2.pdf]

## Materials and Methods

### Cell culture and treatment with siRNAs

Human umbilical vein endothelial cells (HUVECs), purchased from Lonza, were cultured and maintained as described previously<sup>1</sup>. BMPRII siRNA (5'-UGA ACG CAA CCU GUC ACA UAA UAG GCG-3'), ActRIIa siRNA (5'-GGA CUG AUU GUG UAG AAA ATT-3') and ActRIIb siRNA (5'-GGU GUA CUU CUG CUGCUG UTT-3') were custom synthesized from MWG Biotech. Nox1 siRNA (Santa Cruz), Alk1 and Alk2 siRNA (Dharmacon), Alk6 and Alk3 siRNAs (Ambion) and non-silencing control (Invitrogen) were used at 100 nM (unless indicated otherwise) to transfect HUVECs using Oligofectamine (Invitrogen) in serum-free media for 5h as described previously<sup>1</sup>. Knockdown efficiency of siRNAs was confirmed by qPCR and Western blot analysis.

### Neutralizing BMP9 and 10 antibodies

HUVECs transfected with BMPRII siRNA (BRII.si) or non-silencing siRNA (Non.si) for 5h were incubated in complete medium containing 10% fetal bovine serum and neutralizing antibodies for BMP9 (10 µg/ml), BMP10 (10 µg/ml) (R&D Biosystems) or control IgG as described previously<sup>2</sup>.

### BMPRII overexpression

HUVECs were treated with or without BMPRII siRNA for 5h. Cells were further infected with adenoviral constructs encoding for BMPRII-wild-type (WT) or BMPRII short form (short) lacking the c-terminal tail region (provided by Dr. Akiko Hata), for 1 day in complete medium as previously described<sup>3</sup>. Expression of BMPRII and endothelial inflammation was determined by Western blot analysis using antibodies to BMPRII, intercellular adhesion molecule (ICAM-1) and vascular cell adhesion molecule (VCAM-1).

### Human Coronary Arterial Samples

Coronary arteries were obtained from patients undergoing heart transplant in an Institutional Review Board approved study at Emory University with written informed consent. Frozen sections were prepared and were processed from immunohistochemical staining. Atherosclerotic lesions were classified according to the American Heart Association classification<sup>4,5</sup>.

### BMPRII heterozygotic null mice

BMPRII<sup>+/-</sup> mice on C57BL/6 background<sup>6</sup>, provided by Dr. Hideyuki Beppu, were crossed with ApoE<sup>-/-</sup> mice to generate BMPRII<sup>+/-</sup>ApoE<sup>-/-</sup> mice. All experiments were performed with littermate BMPRII<sup>+/+</sup>ApoE<sup>-/-</sup> as wild-type controls.

### Acute atherosclerosis model (Partial carotid ligation)

All animal studies were performed using 8-week-old male BMPRII<sup>+/-</sup>ApoE<sup>-/-</sup> and littermate BMPRII<sup>+/+</sup>ApoE<sup>-/-</sup> mice as control. All procedures were carried out according to the approved Institutional Animal Care and Use Committee protocol for this study by Emory University. Partial ligation of LCA was carried out under anesthesia as previously described<sup>7</sup> to induce low and disturbed flow in the LCA. Following carotid ligation, *d-flow* in LCA and *s-flow* in RCA was confirmed at one day post-ligation by ultrasonography using the Vevo770 system (Visualsonics, Canada)<sup>7,8</sup>. RCA and LCA were isolated at indicated experimental end-points.

## **Chronic atherosclerosis model (High-fat diet fed model)**

BMPRII<sup>+/-</sup>ApoE<sup>-/-</sup> mice and BMPRII<sup>+/+</sup>ApoE<sup>-/-</sup> littermate controls were used as indicated and maintained for 2 months on the Paigen's high-fat diet (HFD; Science Diets) containing 1.25% cholesterol, 15% fat, and 0.5% cholic acid<sup>9,10</sup>. Mice were provided water ad libitum. Explanted aortic tree were processed for subsequent plaque analysis and immunohistochemical analysis.

## **Quantitative real-time PCR (qPCR)**

Total RNA was polyadenylated and reverse transcribed for use in a two-step qPCR setup using High-capacity cDNA synthesis kit (ABI) and using Brilliant II SYBR Green QPCR Master Mix (Stratagene) with custom designed primers on a Real-Time PCR System (StepOne Plus, Applied Biosystems)<sup>8</sup>. Fold changes between LCA and RCA were determined for all targets using the  $\Delta\Delta C_t$  method<sup>11</sup>. Sequences for primers used for mRNA expression studies have been listed in Supplementary Table 2.

## **Western blotting**

Following treatments, cell lysates were prepared and analyzed by Western blot analysis as described previously<sup>12,13</sup>. The membranes were probed with antibodies to Alk2 (1:1000, R&D), Alk3 (1:500, Santa Cruz), Alk6 (1:500, Santa Cruz), BMPRII (1:500, BD), ICAM-1 (1:1000, Santa Cruz), VCAM-1 (1:1000, Santa Cruz), Nox-1 (1:2000), FLAG (1:3000) or  $\beta$ -actin (1:1000, Sigma), total SMAD and phospho-SMAD antibodies (1:1000) (Cell Signaling) and appropriate secondary antibodies conjugated to alkaline phosphatase, which were detected by a chemiluminescence method.

## **Immunofluorescence staining**

Frozen sections of human coronary arteries were fixed in ice-cold acetone for 5 min, blocked for 1 hour with 10% donkey or goat serum, and incubated with primary antibodies overnight at 4°C, followed by Rhodamine-conjugated secondary antibodies for 2 h at room temperature as described<sup>12</sup>. Nuclei were counter-stained with DAPI (Sigma). Primary antibodies used were specific for Alk2 (1:50, R&D systems), BMPRII (1:50, Santa Cruz), PECAM-1 (1:50, BD), CD45 (1:100, eBioscience), ICAM-1 (1:100, Santa Cruz) and VCAM-1 (1:100, BD). Twenty different human coronary artery sections, containing various stages of atherosclerosis from minimally diseased to advanced atheroma stages, from nine different patients, were examined. Images were taken using a Zeiss epi-fluorescence microscope. The semi-quantification method was used based on the blinded grading for atheroma intensity and BMPRII staining intensity in endothelium using one to five scale (1: minimally diseased, low staining intensity, 5: advanced atheroma, high staining intensity). Similar methodology was used for mouse thoracic aorta as described above in this section was used for ICAM-1 and VCAM-1 staining.

## **Monocyte binding assay**

Following BMPRII siRNA transfection for two days and BMP4 treatment for 4h in HUVECs, monocyte binding assay was performed as described previously<sup>12</sup>. In some studies of HUVECs, apocynin (Calbiochem) or an NF $\kappa$ B inhibitor, BAY 11-7082 (Sigma) were treated for two days after 5h of transfection of BMPRII or non-silencing siRNA.

## **Amplex-Red assay for measuring hydrogen peroxide**

Extracellular H<sub>2</sub>O<sub>2</sub> was measured using a horseradish peroxidase-linked Amplex Red fluorescence assay. Briefly, after cells were transfected with non-silencing or BMPRII siRNA,

media were washed twice with Krebs Ringer Phosphate (KRP) buffer and incubated with 5  $\mu$ M Amplex UltraRed (Molecular Probes) and 0.1 U/ml horseradish peroxidase type II (Sigma-Aldrich) in KRP for 40 minutes. Triplicate reading were taken in a 96-well plate using 100  $\mu$ l samples of media, and fluorescence was detected via plate reader at excitation and emission of 530 nm and 580 nm, respectively. Hydrogen peroxide levels were normalized to cellular protein as measured by the Bio-Rad DC assay.

### **Serum Lipid Analysis**

Serum lipid analysis from the mouse samples was performed by Cardiovascular Specialty Laboratories, (Atlanta, GA). All lipid determinations were performed using a Beckman CX7 biochemical analyzer and reagents from Beckman Diagnostics (Fullerton, CA) for total cholesterol, triglycerides, HDL and LDL<sup>14</sup>.

### **Atherosclerotic lesion analysis**

To examine atherosclerosis development in the carotid artery, aorta and carotid arteries were isolated *en bloc* as described above. Aortic trees, RCA and LCA were photographed using a CCD camera (Moticam 2500, Motic) attached to a dissection microscope at 3x magnification and the opaque area covered by plaque and total artery area of LCA were measured using NIH ImageJ software<sup>15</sup>.

### **Oil-red-O staining**

Oil-red-O staining was carried out using frozen sections as described<sup>7</sup>.

### **Dihydroethidine (DHE) staining for measuring superoxide generation**

The evaluation of basal ROS production in BMPRII<sup>+/-</sup>ApoE<sup>-/-</sup> and BMPRII<sup>+/+</sup>ApoE<sup>-/-</sup> were performed as described before<sup>7,16</sup>. DHE hydrochloride (5  $\mu$ M, Molecular Probes) was applied to the freshly cut frozen aortic sections (10  $\mu$ m) for 30 min at 37°C to reveal the presence of ROS as red fluorescence (585 nm) by Zeiss (Jena, Germany) fluorescence microscope.

### **Statistical Analysis**

Values are expressed as means $\pm$ SEM unless otherwise indicated. Pairwise comparisons were performed using one-way or two-way Student T-tests. Multiple comparisons of means were performed using 1-way ANOVA followed by Tukey's Multiple Comparison tests. Differences between groups were considered significant at P values below 0.05.

### **References:**

1. Ni CW, Qiu H, Jo H. MicroRNA-663 upregulated by oscillatory shear stress plays a role in inflammatory response of endothelial cells. *Am J Physiol Heart Circ Physiol*. 2011;300:H1762-1769
2. David L, Mallet C, Keramidas M, Lamande N, Gasc JM, Dupuis-Girod S, Plauchu H, Feige JJ, Bailly S. Bone morphogenetic protein-9 is a circulating vascular quiescence factor. *Circ Res*. 2008;102:914-922
3. Chan MC, Nguyen PH, Davis BN, Ohoka N, Hayashi H, Du K, Lagna G, Hata A. A novel regulatory mechanism of the bone morphogenetic protein (bmp) signaling pathway

- involving the carboxyl-terminal tail domain of bmp type ii receptor. *Molecular and cellular biology*. 2007;27:5776-5789
4. Stary HC, Chandler AB, Dinsmore RE, Fuster V, Glagov S, Insull W, Jr., Rosenfeld ME, Schwartz CJ, Wagner WD, Wissler RW. A definition of advanced types of atherosclerotic lesions and a histological classification of atherosclerosis. A report from the committee on vascular lesions of the council on arteriosclerosis, american heart association. *Circulation*. 1995;92:1355-1374
  5. Virmani R, Kolodgie FD, Burke AP, Farb A, Schwartz SM. Lessons from sudden coronary death: A comprehensive morphological classification scheme for atherosclerotic lesions. *Arterioscler Thromb Vasc Biol*. 2000;20:1262-1275
  6. Beppu H, Kawabata M, Hamamoto T, Chytil A, Minowa O, Noda T, Miyazono K. Bmp type ii receptor is required for gastrulation and early development of mouse embryos. *Dev Biol*. 2000;221:249-258
  7. Nam D, Ni CW, Rezvan A, Suo J, Budzyn K, Llanos A, Harrison D, Giddens D, Jo H. Partial carotid ligation is a model of acutely induced disturbed flow, leading to rapid endothelial dysfunction and atherosclerosis. *Am J Physiol Heart Circ Physiol*. 2009;297:H1535-1543
  8. Ni CW, Qiu H, Rezvan A, Kwon K, Nam D, Son DJ, Visvader JE, Jo H. Discovery of novel mechanosensitive genes in vivo using mouse carotid artery endothelium exposed to disturbed flow. *Blood*. 2010;116:e66-73
  9. Shockley KR, Witmer D, Burgess-Herbert SL, Paigen B, Churchill GA. Effects of atherogenic diet on hepatic gene expression across mouse strains. *Physiol Genomics*. 2009;39:172-182
  10. Ishida BY, Blanche PJ, Nichols AV, Yashar M, Paigen B. Effects of atherogenic diet consumption on lipoproteins in mouse strains c57bl/6 and c3h. *Journal of lipid research*. 1991;32:559-568
  11. Schmittgen TD, Livak KJ. Analyzing real-time pcr data by the comparative c(t) method. *Nature protocols*. 2008;3:1101-1108
  12. Sorescu GP, Sykes M, Weiss D, Platt MO, Saha A, Hwang J, Boyd N, Boo YC, Vega JD, Taylor WR, Jo H. Bone morphogenetic protein 4 produced in endothelial cells by oscillatory shear stress stimulates an inflammatory response. *J Biol Chem*. 2003;278:31128-31135
  13. Jo H, Sipos K, Go YM, Law R, Rong J, McDonald JM. Differential effect of shear stress on extracellular signal-regulated kinase and n-terminal jun kinase in endothelial cells. Gi2- and gbeta/gamma-dependent signaling pathways. *J Biol Chem*. 1997;272:1395-1401
  14. Li L, Chen W, Rezvan A, Jo H, Harrison DG. Tetrahydrobiopterin deficiency and nitric oxide synthase uncoupling contribute to atherosclerosis induced by disturbed flow. *Arterioscler Thromb Vasc Biol*. 2011;31:1547-1554
  15. Vrekoussis T, Chaniotis V, Navrozoglou I, Dousias V, Pavlakis K, Stathopoulos EN, Zoras O. Image analysis of breast cancer immunohistochemistry-stained sections using imagej: An rgb-based model. *Anticancer research*. 2009;29:4995-4998
  16. Griendling KK, FitzGerald GA. Oxidative stress and cardiovascular injury: Part i: Basic mechanisms and in vivo monitoring of ros. *Circulation*. 2003;108:1912-1916
